# Supplementary material for: Human Colon Cancer–Derived Clostridioides difficile Strains Drive Colonic Tumorigenesis in Mice
Source: Cancer Discov. 2022 Jun 9;12(8):1873–85. doi: 10.1158/2159-8290.CD-21-1273 (PMC9357196; doi:10.1158/2159-8290.CD-21-1273)
Supplement: Supplementary Table [file cd-21-1273_table_s3_suppst3.xlsx]

## Sheet: Top 50
	© 2000-2022 QIAGEN. All rights reserved.
	Upstream Regulator	Expr Log Ratio	Molecule Type	Predicted Activation State	Activation z-score	Flags	p-value of overlap	Target Molecules in Dataset	Mechanistic Network
Progenitor cells	HNF4A	-2.135	transcription regulator	Inhibited	-2.346		3.47e-56	AAMDC,ABCE1,ACIN1,ACO1,Acot1,ACP6,ACSS2,ACTN1,ACTR1A,ADSS2,AHNAK,AHSA1,AIMP1,AKIRIN2,AKR1B1,ALCAM,ALDH1A1,ALDH2,ANXA5,AOC1,AP1M1,AP3B1,AP3M1,APEH,AQP1,AQP8,ARFGAP1,ARFIP2,ARHGAP11A,ARMC1,ARMC8,AS3MT,ASB3/GPR75-ASB3,ASNS,ATAD5,ATF6B,ATP6V1D,ATP7A,AXIN2,AZI2,BACE1,BAG4,BARD1,BAZ1B,BCLAF1,BET1,BLVRB,BNIP1,BPGM,BRD8,BSDC1,BTG1,C11orf54,C11orf58,C1D,C4orf19,C5orf22,CAMK2D,CAP1,CASP2,CBR3,CBS/CBSL,CBX3…	2049 (16)
	MYC	1.762	transcription regulator	Activated	11.138		2.54e-54	ABCC4,ABCD3,ABCE1,ABCF1,ABCF2,ACACA,ACSS1,ACTB,ACTN1,ADD1,AEBP2,AHCY,AKAP1,AKT1,ALCAM,ALDH18A1,ALKBH5,ANKRD17,ANXA4,ANXA5,AQP1,ARAF,ARHGEF7,ARL6IP1,ARNTL,ASNS,ATAD3A,ATP5IF1,AURKB,AXIN1,BAX,BCL2,BCOR,BIN1,BIRC2,BIRC5,BMPR1A,BOP1,BRCA1,BRD2,BUB1B,BZW2,C1QBP,CAD,CAMK2N1,CANX,CAPZB,CASP8,CAST,CCNA2,CCNB1,CCNB2,CCND1,CCND2,CCT3,CD44,CD47,CD9,CDC20,CDC25A,CDC25B,CDC34,Cdc42,CDCA7,CDH1,CDK1,CDK2,CDK4,C…	1519 (18)
	TP53	1.837	transcription regulator		-0.999		1.91e-53	AATF,ABAT,ABCB1,ABHD4,ACO1,ACOT11,ACSS1,ACSS2,ACTB,ACTN1,ADD3,ADH5,AGO2,AHCY,AK4,AKR1B1,AKT1,ALDH18A1,ALDH1A1,ALDH1B1,ALDH9A1,ANLN,ANXA2,ANXA3,ANXA4,ANXA8/ANXA8L1,AP3B1,APAF1,APBB2,APC,API5,ARAP2,ARHGAP5,ARL6IP1,ARPC1B,ASF1B,ASL,ASNS,ATG2B,ATG4B,ATP1A1,ATP5F1C,Atp5k,ATP5MC3,ATPAF2,ATXN1,AURKA,AURKB,AXIN2,BAP1,BAX,BCL2,BCL3,BIRC2,BIRC3,BIRC5,BOK,BOP1,BRAF,BRCA1,BRCA2,BTG1,BUB1B,CA9,CALU,CAMK2B,CAM…	1117 (17)
	GABA		chemical - endogenous mammalian	Inhibited	-7.888	bias	1.74e-44	ACTB,ADCY6,ADI1,ADSL,AGPAT3,AGPS,Alyref,ANAPC5,AP2A2,Ap2b1,ATP1A1,ATP1B1,ATP2A2,ATP5F1B,Atp5k,ATP6AP1,B4GALT6,BTG1,Calm1 (includes others),CASP8,CCND2,CD63,CDC34,CDKN1B,CKAP4,CLTC,COASY,COX17,COX5A,Cox7c,CPSF1,CTBP1,CUL3,DAAM1,DCP2,DDC,DDX39B,DERL2,EEF1A1,EGLN1,EIF2S3,EIF3A,EIF4A2,EIF4G2,EIF5B,EXOSC10,EXOSC8,FASN,FOS,FUT8,GANAB,GCLM,GNA12,GNAI2,GNL3,GRK6,GYS1,HDAC1,HERC1,HERC2,HERPUD1,HEXA,HNF4G,…	1818 (18)
	E2F4	-0.086	transcription regulator		-0.145		2.71e-39	ALG5,ANLN,ASF1B,ATRX,AURKB,BARD1,BCL2,BRCA1,BRD2,BUB3,C5orf22,CASP4,CASP6,CBX5,CCNA2,CCNB2,CCND1,CDC25A,CDCA3,CDCA4,CDK1,CDK2,CDKN1A,CDKN2C,CENPA,CENPE,CEP57,CFAP20,CHEK2,CKS1B,CKS2,CSDE1,CSTF1,DBF4,DDB1,DHFR,DUOX2,DUT,E2F1,E2F2,E2F8,ECT2,EIF2B2,EMC4,EPAS1,EXOSC8,FDFT1,FOXM1,GINS1,GMNN,GOLT1B,HLTF,HMMR,HSP90B1,ID3,IER5,KHDRBS1,KIF22,KIF4A,MAD2L1,MCL1,MCM10,MCM3,MCM4,MCM5,MCM6,MKI67,MLH1,MRTO4,MSH…	1321 (12)
	E2F1	0.808	transcription regulator	Activated	5.063	bias	1.43e-33	ABCB1,ACTR1A,ADIPOR2,AKT1,ALG5,APAF1,ARID1A,ATG12,ATG4B,ATG5,AURKA,AURKB,BAX,BCL2,BIRC5,BOK,BRCA1,BUB3,CA2,Calm1 (includes others),CALR,CASP6,CASP8,CBX5,CCNA2,CCNB1,CCNB2,CCND1,CCND2,CCNF,CCT2,CCT4,CD44,CD9,CDC20,CDC25A,CDC25B,CDC45,CDCA4,CDK1,CDK2,CDK4,CDKN1A,CDKN1B,CDKN2C,CEBPA,CHEK2,CITED2,COPS8,COX4I1,COX5A,Cox7c,CSDE1,CSE1L,CTNNB1,DBF4,DDX1,DDX39B,DHFR,DIABLO,DNMT1,DUT,E2F1,E2F2,E2F8,ECT2,EE…	1247 (15)
	ESR1	0.221	ligand-dependent nuclear receptor	Activated	3.631		2.63e-32	AATF,ABCB1,ABI2,ACACA,ADAM17,ADD3,AGGF1,AHNAK,AKAP1,AKT1,AKT1S1,AKT2,ALCAM,ANAPC5,ANLN,ANXA3,ANXA4,AP1G2,AP1M1,AP1S1,AP1S3,AP3B1,APC,AQP1,ARAF,ARFGAP1,ARFIP2,ARHGEF11,ARHGEF7,ARID4A,ARNTL,ARPC5L,ATG13,ATP11A,ATP1B1,AURKA,AXIN2,BAX,BCL2,BCLAF1,BET1L,BIN1,BIRC3,BIRC5,BRCA1,BRCA2,BRWD1,BUB1B,BUB3,CA12,CA2,CAMK2B,CAP2,CASP6,CASP8AP2,CBL,CBLC,CCAR1,CCNA2,CCNB1,CCND1,CCNG1,CCNH,CCNT2,CD74,CDC27,CDC42BP…	1961 (21)
	CST5	-2.337	other	Inhibited	-5.328	bias	5.34e-32	ACAT2,ADSL,AGO1,AHCTF1,AHNAK,ANXA2,ANXA3,ANXA5,AP1M2,AP3B1,AP3D1,ATP8B1,CD44,CDH1,CEBPZ,CHD3,CLDN7,CNBP,CNOT8,COPS7A,COPS8,CREBBP,DDX18,DDX21,DDX54,DHX9,DNAJA3,DNAJB11,DOCK5,EBNA1BP2,EDC3,EEF1B2,EEF1D,EEF1G,EIF2B1,EIF2B2,EIF5B,ESRP1,EZR,FHL1,GDA,GNL3,GPRC5A,GRSF1,GTF2H3,GTPBP10,HNRNPA2B1,HNRNPC,HNRNPDL,HNRNPH1,HNRNPU,HS2ST1,ID3,IGBP1,IGSF9,INTS10,INTS4,JMJD1C,KIF11,LIMD2,LYAR,MALSU1,MAP1S,MNT,MRT…
	LARP1		translation regulator	Inhibited	-8.122	bias	6.54e-32	EEF1A1,EEF1B2,EEF1D,EEF1G,EEF2,EIF3A,EIF3E,EIF3F,EIF4B,PABPC1,RACK1,RPL10,RPL10A,RPL11,RPL12,RPL13A,RPL14,RPL15,RPL17,RPL18,RPL19,RPL21,RPL22,RPL23,RPL24,RPL26,RPL27,RPL27A,RPL28,RPL3,RPL30,RPL31,RPL35,RPL35A,RPL37,RPL37A,RPL38,RPL39,RPL4,RPL41,RPL5,RPL6,RPL7,RPL7A,RPL8,RPS11,RPS12,RPS13,RPS14,RPS15,RPS15A,RPS16,RPS18,RPS19,RPS2,RPS20,RPS21,RPS23,RPS25,RPS27A,RPS3,RPS5,RPS6,RPS7,RPS8,RPS9,TPT1
	MYCN	-0.554	transcription regulator	Activated	6.138		1.02e-31	ABCB1,ABCB7,ABCC4,ABCD3,ABCE1,ABCF1,ABCF2,ACTB,AEBP2,ALDH1A1,ARPC1B,ATXN2,B2M,BAX,BCL11A,BCL11B,BIRC5,CAD,CCND1,CCND2,CCNH,CCNT1,CDK7,CDK9,CDKN1A,CDKN1B,CITED2,CKAP4,CTDNEP1,DNMT3A,E2F1,E2F2,EED,EEF1A1,EEF1D,EEF1G,EEF2,EGFR,EIF4A1,EIF4G2,EIF5A,EMP1,EZH1,EZH2,FAU,FGFR2,FKBP9,GAPDH,GATA6,HDAC2,HK2,HLA-A,HLA-DQB1,HMGA1,HSP90AB1,HSPD1,ITGA2,ITGB1,JARID2,KLK3,LDHA,MAGT1,MAP4,MAT2A,MRE11,MXI1,MYH9,MYL1…	1778 (23)
	MLXIPL	0.323	transcription regulator	Activated	7.981	bias	5.56e-30	ACACA,ACSS2,ADIPOR2,AGPS,ANXA2,CEBPA,DHRS7B,ELOVL6,FASN,GNPAT,HMGCS2,MID1IP1,MLXIPL,NR1D1,PCK1,PGD,PPARG,RPL10,RPL10A,RPL11,RPL12,RPL13A,RPL14,RPL15,RPL17,RPL18,RPL18A,RPL19,RPL21,RPL22,RPL23,RPL24,RPL26,RPL27,RPL27A,RPL28,Rpl29 (includes others),RPL3,RPL30,RPL31,Rpl32,RPL35,RPL35A,Rpl36a,RPL36AL,RPL37,RPL37A,RPL38,RPL39,RPL4,RPL41,RPL5,RPL6,RPL7,RPL7A,RPL7L1,RPL8,RPL9,RPLP0,Rplp1 (includes other…
	RICTOR	0.501	other	Inhibited	-3.833	bias	1.14e-29	ATP5F1B,ATP5F1C,ATP5F1D,ATP5MC2,ATP5MC3,ATP5MF,ATP5MG,ATP5PD,ATP5PO,ATP6AP1,ATP6V1C1,ATP6V1D,ATP6V1G1,BAX,BIRC5,COX10,COX17,COX4I1,COX5A,Cox5b/Gm34962,COX6A1,COX6B1,Cox6c,COX7A1,COX7A2,COX7A2L,Cox7c,CYC1,DAXX,FAU,HK2,MCL1,MRPL13,NDUFA1,NDUFA10,NDUFA11,NDUFA4,NDUFA5,NDUFA6,NDUFB10,NDUFB4,NDUFB5,NDUFB6,NDUFB8,NDUFB9,PAK1,PDK1,POMP,PPA1,PPA2,PRKCA,PRKCB,PSMA2,PSMA3,PSMA4,PSMA5,PSMA7,PSMB10,PSMB2,PSM…	1712 (23)
	COPS5	0.02	transcription regulator		1.676		2.92e-29	ADCY6,AIMP1,APAF1,ATRX,AURKB,BAX,BIRC5,CANT1,CBX1,CCNA2,CCNF,CCNG1,CCNT1,CD81,CD82,CDC20,CDK4,CDKN1A,CDKN1B,CDKN2C,CEBPA,CENPH,CETN2,CHMP1A,CSE1L,CUL1,DBF4,DCK,DCTPP1,DCXR,DDIT4,DLGAP5,DTYMK,DUT,E2F1,EDF1,ESPL1,FBXO5,GINS1,GPS1,GPX4,GTF2H5,GUK1,HELLS,HMGA1,HMGB2,HMMR,HNRNPU,HSPA4L,IER5,IRAK1,KIF11,KIF15,KIF22,KIF23,KIF5B,KPNB1,LMNB1,MAD2L1,MCM2,MCM5,MCM6,MCM7,MELK,MKI67,MSH2,MYC,NAP1L1,NCL,NDC80,…	1761 (27)
	torin1		chemical reagent		0.548	bias	5.64e-29	ACSS2,ALDH1B1,ALDH9A1,ATP5F1B,ATP5MF,ATP5MG,ATP5PD,ATP6AP1,ATP6V0E1,ATP6V1C1,ATP6V1D,BPGM,CCND1,CDH1,CDKN1B,COX10,COX17,COX4I1,COX5A,COX6B1,COX7A2,CYC1,EEF1A1,EEF1B2,EEF1D,EEF1G,EEF2,EIF3A,EIF3E,EIF3F,EIF4B,FASN,GAPDH,HK2,LDHA,NDUFA1,NDUFA6,NDUFB10,NDUFB8,PABPC1,PDHB,PGK1,PKM,PPA1,RACK1,RPL10,RPL10A,RPL11,RPL12,RPL13A,RPL14,RPL15,RPL17,RPL18,RPL19,RPL21,RPL22,RPL23,RPL24,RPL26,RPL27,RPL27A,RPL28,…	1395 (16)
	CD 437		chemical drug	Inhibited	-4.817	bias	7.74e-29	AKR1B1,API5,ARPC3,ATP5F1B,ATP5F1C,ATP5MC3,ATP5MG,ATP5PO,BANF1,BAX,CCAR1,CCT2,CCT3,CCT6A,CDK4,CDKN1A,CEBPB,COX7A2,COX7A2L,E2F1,EEF2,EIF3D,EIF3G,EIF3I,EIF4A1,EIF4A2,EIF4B,EIF5A,ERH,FKBP5,FOS,FTH1,FTL,HADHA,HNRNPC,HSP90AA1,ILF2,IMP3,INO80B,ITM2B,JUN,KARS1,KIF2C,LSM3,MEN1,MGST1,MOB1A,MYC,NACA,NARS1,NDUFB9,NFKBIA,NME1,NOP10,NPM1,PABPC1,PCBP1,PHYH,PIN1,PLP2,POLR2G,PSMA4,PSMD3,PSMF1,PURB,RBMX,RPL10,RPL1…	1034 (17)
	acyline		biologic drug		-0.13		4.01e-28	BAX,BCL2,EEF1A1,EEF1B2,EEF1E1,EEF2,EIF3F,FGFR2,FGFR4,FOS,JUN,LDLR,MYC,NOS2,RPL10,RPL10A,RPL12,RPL13A,RPL15,RPL17,RPL18A,RPL21,RPL23,RPL24,RPL26,RPL27,RPL27A,RPL28,Rpl29 (includes others),RPL3,RPL30,RPL31,Rpl32,RPL35,RPL35A,Rpl36a,RPL37,RPL39,RPL5,RPL6,RPL7,RPL8,RPL9,RPLP2,RPS10,RPS11,RPS13,RPS15,RPS15A,RPS16,RPS17,RPS18,RPS19,RPS2,RPS20,RPS23,RPS25,RPS26,Rps27/Rps27rt,Rps3a1,RPS4Y1,RPS5,RPS6,RPS7…	660 (10)
	beta-estradiol		chemical - endogenous mammalian	Activated	5.617		1.38e-27	2010016I18Rik,ABCB1,ABL1,Acot1,ACP3,ACTB,AFF4,AGO2,AKAP1,AKAP10,Akap9,AKT1S1,ALCAM,ALDH18A1,ALDH2,ALDH3A2,ALG3,ALG5,ALG9,Ang4,ANO1,Anp32a,ANXA2,ANXA3,ANXA4,AP1G1,AP1S1,AP3D1,APAF1,APC,AQP1,ARAF,ARF5,ARHGEF12,ARHGEF39,ARID4A,ARID5B,ARPC1B,ARSB,ATP1B1,ATP5F1B,ATP5MC2,ATP5PD,ATP6AP1,ATRX,ATXN3,AURKA,B3GNT7,BACE2,BAX,BCL10,BCL2,BIN1,BIRC3,BIRC5,BLNK,BMPR1A,BNIP3L,BOP1,BRCA1,BRCA2,BTG1,BUB1B,BUB3,C15o…	2142 (19)
	CEBPB	1.423	transcription regulator	Activated	10.476	bias	5.97e-27	ABCB1,AKR1B10,ALDH1A1,AOC1,ARPP19,ASF1B,ASNS,AURKA,AURKB,BARD1,BCL2,BIRC5,BLNK,BRCA1,BRCA2,BUB1B,CBX5,CCNA2,CCNB2,CCND1,CCND2,CD14,CD74,CDC20,CDC25A,CDC25B,CDC45,CDCA3,CDCA8,CDK1,CDK4,CDKN1A,CDKN1B,CDKN2C,CDKN3,CDO1,CDT1,CEBPA,CEBPB,CEBPD,CENPE,CENPM,CFTR,CHEK2,CIT,CLPP,CSE1L,CTCF,CTNNB1,CTPS1,CTSC,DAPK1,DCTPP1,DEGS1,DEK,DGAT2,DHFR,DHRS1,DHX9,DLGAP5,DNMT1,DUT,DYNLT1,E2F1,E2F8,EED,EIF2S1,ESPL1,EXO…	1351 (18)
	1,2-dithiol-3-thione		chemical reagent	Activated	6.463	bias	9.86e-27	AGPAT3,AKR1A1,AKR1B10,ATP1A1,B4GALNT1,CBR1,CCT3,CCT7,CDC34,CELA1,CHORDC1,CLPP,CLPTM1L,CREG1,CUL1,DAD1,DDX39B,DDX50,DNAJB11,DNAJC3,EIF2S1,EIF3D,EIF3E,EIF3G,EIF4G2,EPB41,EPHB4,ERP29,ETV6,FKBP5,FTH1,GCLC,GCLM,GNA11,GNA14,GSPT1,GSR,GSTA3,Gsta4,GSTM1,Gstm3,GSTM5,GSTT2/GSTT2B,HM13,HMBS,HSD3B1,HSP90AA1,HSP90AB1,HSP90B1,HTATIP2,IDE,LMNA,LY6E,M6PR,MGLL,MORF4L2,MSMO1,NARS1,NCKAP1,NQO1,PCBP1,PDIA4,PDIA6,PRD…	254 (4)
	arsenic trioxide		chemical drug		-0.147		6.02e-26	ACAT2,ARL6IP1,ATP1B1,ATP1B3,ATP5F1D,ATP5MC2,ATP5MC3,ATP6AP1,ATP6V1C1,AURKA,BAX,BCL2,BCL2L14,BLVRA,BLVRB,BNIP3L,CALR,CASP8,CBR1,CCND1,CCNH,CD44,CDC25B,CDC45,CDK1,CDK6,CDKN1A,CNBP,COX6B1,COX7A2,COX7A2L,CTNNB1,CUL3,CYB5R1,CYC1,DBF4,DHX15,DNAJB11,DNAJB6,DNAJC10,DNMT1,DNMT3A,ECD,ECT2,EPAS1,ERP29,ETV5,FADS1,FAIM,FASN,FDFT1,FDPS,FTH1,GCLC,GCLM,GLRX,GSPT1,GSR,HAT1,HBA1/HBA2,HSP90AB1,HSP90B1,HSPA5,HSPE1,H…	1663 (22)
	KRAS	-0.389	enzyme	Activated	2.191		2.9e-25	ABCC4,Acp5,AGO2,AHCTF1,AHNAK,AKR1B10,Akr1c14,ALG9,AMPD3,ANXA8/ANXA8L1,ARPC3,ARPP19,ATAD3A,ATG5,ATP1B1,AURKA,AURKB,AXIN2,B2M,B3GALNT2,BCL2,BCL2L14,BIRC3,BIRC5,BZW2,CAD,CASP2,CBX5,CCNA2,CCNB1,CCND1,CCT5,CD44,CD74,CDH1,CDK1,CDK4,CDK7,CDKN1A,CDKN1B,CDKN2C,CDT1,CEACAM1,CEBPB,CFTR,CHSY1,CLIC5,CLNS1A,CPM,CS,CSE1L,CSF2RA,CTNNB1,DDAH1,DHFR,DNMT1,DNMT3A,DPYSL2,E2F1,EEF1A1,EGFR,EIF3I,EIF5,EIF5A,EPHB4,ERAP1,…	1936 (21)
	imatinib		chemical drug	Inhibited	-3.923		2.97e-25	ABL1,ARL6IP1,ATP1B1,ATP1B3,ATP5F1D,ATP5MC2,ATP5MC3,ATP6AP1,ATP6V1C1,AURKA,BAX,BCL2,BCL2L14,BIRC2,BIRC5,BIRC6,BLNK,BRCA1,CALR,CAPN1,CASP8,CCNA2,CCNB1,CCND1,CCND2,CCNH,CDC45,CDK2,CDKN1A,CDKN1B,CDKN2C,CEBPA,CEBPB,CHD1,CITED2,CKS1B,CNBP,COX6B1,COX7A2,COX7A2L,CTNNB1,CUL3,CYC1,DBF4,DHX15,DNAJB11,DNAJB6,DNAJC10,ECD,ECT2,EIF4B,EPAS1,ERP29,ESPL1,ETV5,FAIM,FOXO3,GSPT1,HAT1,HBA1/HBA2,HDAC2,HSP90AB1,HSP90B1,…	1501 (16)
	5-fluorouracil		chemical drug	Inhibited	-4.161		7.09e-25	ABAT,ABHD4,AHSA1,ANXA2,ANXA4,APOBEC3B,ATG5,ATP5F1B,ATP5F1C,ATP5PO,BAX,BCL2,BIRC2,BIRC5,BNIP3L,BTF3,CALU,CANX,CCND1,CCND2,CCNG1,CCT3,CCT4,CCT6A,CD81,CD82,CDH1,CDK1,CDK2,CDKN1A,COPS8,COX6A1,COX6B1,CSTF1,DCXR,E2F1,EEF1G,EEF2,EIF3E,EIF3G,EIF4A1,FBL,FDPS,FGFR2,FKBP1A,FOXO1,GAPDH,GARS1,GOT2,GSN,GTF2H2,GTF2I,HADHA,HNRNPA2B1,HNRNPAB,HNRNPC,HSP90AB1,HSPA4L,HSPE1,IARS1,IDH2,IER5,ILF2,JUN,KARS1,KLHL22,LDHA,…	1564 (18)
	ST1926		chemical drug	Inhibited	-5.143	bias	1.69e-21	ACTB,AKR1B1,ARPC3,ATP5F1B,CCT2,CCT3,CCT6A,CDK4,CDKN1A,CEBPB,COX7A2,COX7A2L,EEF2,EIF3D,EIF3E,EIF3G,EIF3I,EIF4A1,EIF4A2,EIF4B,EIF4G2,EIF5A,FKBP5,HSP90AA1,ILF2,IMP3,ITM2B,KARS1,KIF2C,LSM3,MEN1,MGST1,MOB1A,NACA,NARS1,NDUFB9,NME1,NOP10,NPM1,PABPC1,PIN1,POLR2G,PSMA4,PSMD3,PSMF1,PURB,RPL10,RPL18A,RPL19,RPL24,RPL36AL,RPL39,RPL41,RPL6,RPL8,RPS10,RPS15,RPS2,RPS26,RPS27A,SAP18,SLC25A3,SLC30A5,SLIRP,SNRPB,SN…
	tunicamycin		chemical - endogenous non-mammalian	Activated	4.32	bias	1.85e-21	ABCB1,ACACA,ADAM10,ADIPOR2,AKT1,ARFGAP1,ARFGAP3,ASNS,ATP2A2,BACE1,BET1L,BIRC2,BIRC3,CAD,CALR,CANX,CASP2,CASP4,CCND1,CDH1,CDKN1A,CDKN1B,CEBPB,CEBPD,CLPP,COG8,DDIT4,DGAT2,DNAJB11,DNAJC3,E2F1,ECD,EGFR,EIF2A,EIF2S1,EIF4EBP1,ERBB3,FASN,GOLGA4,GOLGA5,GOLT1B,GORASP2,GRN,HDLBP,HERPUD1,HGSNAT,HOOK1,HSP90B1,HSPA5,HSPA9,IBTK,ICA1,IFRD1,IHH,INSR,KLF4,KLK3,LGR5,LMAN1,LMAN2,LMF1,LONP1,LPIN1,MANF,MCL1,MLXIPL,MO…	1568 (21)
	methylselenic acid		chemical reagent		-1.216		2.03e-21	ABCC4,ACP3,ADD3,AKT1,AKT2,ALDH3A2,ARID4A,ATP11A,AURKA,BIRC2,BIRC3,BIRC5,BLVRB,BRCA1,BRCA2,BUB1B,CAMK2N1,CCNA2,CCNB1,CCNB2,CCND1,CD44,CDC20,CDC25A,CDC25B,CDK1,CDK2,CDK2AP2,CDK4,CDKN1A,CENPA,CHEK2,CREB1,DHFR,DNAJC3,DPYSL2,DTYMK,E2F1,ELF3,FKBP5,FOXA1,FOXM1,G3BP2,H1-0,HMMR,HNRNPH3,HSD17B11,HSP90B1,ID1,ID3,IGF1R,ING1,IPO8,IRF1,JAK1,JUN,KIF11,KLF4,KLHL2,KLK3,KRT20,LMNB2,MANF,MAP2K1,MAP2K3,MAP2K5,MAPK1,…	1705 (19)
	SP2509		chemical reagent	Inhibited	-7.267		3.5e-21	ABCC4,ABCE1,AKT2,ARAF,ATP7A,BCL11A,BMPR1A,BRD2,BUB1B,CAP2,CBFA2T2,CCAR1,CCNA2,CCND1,CCND2,CDCA7,CDH1,CDK6,CREB1,CREBBP,CSE1L,CTBP2,CTNNB1,CUL1,DDX3X,DEK,DNMT3A,DSG2,E2F8,EFNB1,EGFR,EHMT2,EIF4B,EIF4G1,ELOVL6,EPHB3,EZR,FLRT3,FOXA1,FRYL,FUBP1,GATA6,HDGF,HERC1,HNRNPA2B1,HOXB9,HSPA5,HSPA9,ID1,IGF2BP2,IGSF9,ILF3,INPP5F,IRAK1,KLF4,KPNB1,L1CAM,LIN9,LMNB1,MANF,MAP1S,MCM2,MDM4,MKI67,MOB2,MTA1,MYC,MYO1B,NCO…
	tazemetostat		chemical drug	Inhibited	-6.767		4.21e-21	ABCC4,ABCE1,AKT2,ARAF,ATP7A,BCL11A,BMPR1A,BRD2,CAP2,CBFA2T2,CCAR1,CCND1,CCND2,CD44,CDCA7,CDH1,CDK6,CREB1,CREBBP,CSE1L,CTBP2,CTNNB1,CUL1,DDX3X,DEK,DNMT3A,DSG2,E2F8,EFNB1,EGFR,EHMT2,EIF4B,EIF4G1,ELOVL6,EPHB3,EZR,FLRT3,FOXA1,FRYL,FUBP1,GATA6,HDGF,HERC1,HNRNPA2B1,HOXB9,HSPA5,HSPA9,ID1,IGF2BP2,IGSF9,ILF3,INPP5F,IRAK1,KLF4,KPNB1,L1CAM,LGR5,LIN9,LMNB1,LRIG1,MANF,MAP1S,MCM2,MDM4,MOB2,MTA1,MUC2,MYC,MYO1B,…	779 (7)
	ERBB2	-0.463	kinase	Activated	5.95	bias	4.3e-21	ABL1,ABRACL,ACSS2,ACTB,ADAM17,ADIPOR2,AHNAK,AKT1,AKT2,ALAD,ANXA2,ARHGEF5,ATP1B3,AURKA,AXIN2,BACE1,BAG2,BARD1,BCAT2,BCL2,BCL3,BIRC3,BIRC5,BUB1B,CCNA2,CCNB1,CCNB2,CCND1,CCND2,CD164,CD47,CD82,CD9,CDC20,CDC25A,CDC25B,CDC27,CDC37,CDC37L1,CDC40,CDC45,CDCA2,CDCA3,CDCA4,CDCA5,CDCA7,CDCA8,CDCP1,CDH1,CDK1,CDK6,CDKN1A,CDKN1B,CDKN2C,CDKN3,CDT1,CEBPB,CENPA,CENPE,CHCHD10,CHD1L,CHD4,CHD6,CHD7,CHMP2B,CKS1B,CKS2,…	1818 (19)
	YAP1	0.603	transcription regulator	Activated	5.002	bias	5.44e-21	ACACA,ACAT2,AKT1,ANLN,AURKB,BAX,BIRC5,CASP8,CCNA2,CCNB1,CCND1,CCNF,CDC20,CDCA5,CDH1,CDK1,CDK2,CDK6,CDKN1A,CDKN1B,CDX2,CEP85,CIT,CTNNB1,DDAH1,DICER1,DTYMK,E2F1,EGFR,FASN,FOS,FOXM1,FSHR,GAB1,GINS1,HMGCS2,Hmgn2 (includes others),ID1,IFIT1,IGF1R,IGFBP4,JAK1,KIF23,LDHA,LMNA,LMNB1,MCM3,MCM6,MYC,MYH9,NEK2,NF2,NLRC4,NOS2,NUAK2,NUPR1,PLK1,POLA1,PTEN,RAD51,RASSF4,RPL10,RPL10A,RPL11,RPL12,RPL13A,RPL14,RPL15…	1819 (26)
	MYCL	0.958	transcription regulator	Activated	5.967	bias	5.9e-21	Alyref,ARPP19,ATP5F1D,ATP5MG,BUB3,CAD,CCNT1,CDC20,CDC5L,CDK13,CDK4,CDK7,CENPV,CHD7,CINP,COX7A2L,CSNK1A1,DDX3X,FARSA,FAU,GPHN,HSPD1,IWS1,LARS1,LUC7L3,NARS1,NEDD9,NUDT21,OXA1L,PTBP2,PUS1,Qars,Rbm25,RPL10A,RPL11,RPL12,RPL13A,RPL15,RPL17,RPL18,RPL19,SAP18,SLC25A5,SNRPA1,SNRPD1,Snrpg,TARS1,THOC2,THRAP3,TIMM23,TOMM20,TOP1,UCK2,UCKL1,USP8,WDR75,YARS1
	trichostatin A		chemical drug	Inhibited	-3.555		1.47e-20	ABCB1,ABCC4,ABCE1,ACOT7,ACTB,ADGRL2,AKR1B1,AKT2,ALDH1A1,APAF1,APPBP2,ARAF,ARFIP2,ARL6IP1,ATP7A,AURKB,B2M,BAX,BCL11A,BCL2,BLVRA,BLVRB,BMPR1A,BRCA1,BRCA2,BRD2,BTG1,CA12,CA9,CAD,CAP2,CAST,CBFA2T2,CBR1,CCAR1,CCNA2,CCNB2,CCND1,CCND2,CD14,CD44,CD9,CDC123,CDC27,CDCA7,CDH1,CDK1,CDK6,CDKN1A,CDKN1B,CEBPA,CEBPB,CENPM,Ces1g,CKS1B,CREB1,CREBBP,CSE1L,CSTF2,CTBP2,CTNNB1,CTPS1,CUL1,CYP3A7,CYP4B1,DDX3X,DEK,DNMT1,…	1801 (20)
	XBP1	0.366	transcription regulator	Activated	7.346	bias	6.97e-20	ACACA,ADAM10,APBB2,ARCN1,ARFGAP3,ATF6B,ATG5,ATP2A2,BCL2,BET1,BET1L,BFAR,CALR,COG3,COG6,COPG1,COPZ1,CREB3,CREB3L1,CRK,DAD1,DDOST,DNAJB11,DNAJC1,DNAJC10,DNAJC3,DOLPP1,E2F1,ERP29,FASN,FKBP2,GALK2,GMPPA,GOLGA4,GOLGB1,GOLPH3,GOLPH3L,GOPC,GORASP2,HDAC3,HERPUD1,HM13,HSP90B1,HSPA5,HYOU1,KLF4,LMAN1,LMAN2,MAN1A1,MAP1LC3B,MGAT2,MOGS,MYC,NOS2,OSTC,P4HB,PDIA4,PDIA5,PDIA6,PGM3,RABAC1,RELA,RPN1,RPN2,Rrbp1,S100A…	1230 (16)
	CD3		complex	Activated	7.032	bias	7.24e-20	ACP3,AHCYL1,AIMP1,ALKBH1,ANAPC1,ATP5F1C,ATP8A2,BCL2,BIRC3,BIRC5,BTG1,BZW1,CASP6,CASP8,CBL,CCND1,CCND2,CCNH,CD44,CD74,CDC25A,CDK1,CDK2,CDK2AP1,CDK4,CDK6,CDK7,CDKN1B,CEACAM1,CKS1B,CKS2,CLIP1,CLK1,COX5A,COX7A1,CS,CSTF2,CUL4A,CYBA,CYC1,DAD1,DDX18,DHRS4,DPP4,DUSP11,EIF4A3,EXOSC8,FBL,FDPS,FHIP2A,FKBP1A,FKBP2,FOS,FTL,FYB1,G6PD,GABPB1,GAPDH,GOLGB1,GPRC5A,GTF2IRD1,GTPBP4,GYS1,GZMA,HAT1,HDAC2,HELLS,HINT1,H…	1784 (21)
	NFE2L2	-0.487	transcription regulator	Activated	7.384	bias	2.06e-19	ABCC4,Acp5,ACSS2,AGPAT3,AKR1A1,AKR1B10,AKR7A2,APPBP2,ARHGEF3,ATP1A1,B4GALNT1,BCL2,BRCA1,Calm1 (includes others),CBR1,CCT3,CCT7,CDC34,CDH1,CDKN1A,CDKN2C,CEBPA,CELA1,Ces1g,CHORDC1,CLPP,CLPTM1L,COX4I1,CREG1,CS,CUL1,DAD1,DDX39B,DDX50,DNAJB11,DNAJC3,EIF2S1,EIF3E,EIF3G,EIF4G2,EPAS1,EPB41,EPHB4,ERP29,ETV6,FKBP5,FOXO3,FTH1,FTL,G6PD,GCLC,GCLM,GLUD1,GNA11,GNA14,GNAI2,GPX2,GPX4,GSPT1,GSR,GSS,GSTA3,Gsta4,GST…	1551 (20)
	RRP1B	0.714	transcription regulator				2.46e-19	ANAPC13,APAF1,AURKA,BIRC5,BRCA1,BRCA2,CCNA2,CCNB2,CCND1,CCNG1,CDC20,CDK1,CDKN1A,CEBPB,CREBBP,DBF4,DHFR,EIF4B,EP300,ESPL1,FOXO1,HAT1,HSP90AA1,HSP90AB1,KIF11,MCM2,MCM3,MCM4,MCM5,MCM6,NCOA1,NCOA2,NLK,PCNA,PERP,PLK1,POLD1,PRKCA,RBL1,RHOQ,RPA1,RPA2,RPL11,RPL13A,RPL14,RPL19,RPL22,RPL27,RPL37,RPL37A,RPL39,RPL6,Rplp1 (includes others),RPS10,RPS14,RPS19,RPS26,Rps27/Rps27rt,RPS3,RPS5,RPS8,RPS9,TOP2A,TOPBP1…
	sirolimus		chemical drug	Inhibited	-5.86		9.28e-19	ABHD11,ACACA,Acp5,ACTB,ADSS2,AKT1,ANXA5,APPL1,ASNS,ATP1A1,ATP5F1C,ATP5MG,ATP6V1D,ATP6V1G1,AURKA,AURKB,B2M,BAX,BCL2,BCL3,BIRC5,CCNA2,CCNB2,CCND1,CCND2,CCNF,CDC25A,CDK1,CDK4,CDK6,CDKN1A,CDKN1B,CEBPA,CEBPB,COX6A1,COX6B1,CREG1,DAD1,DDIT4,DDX56,DENND1A,DNAJC2,DOT1L,DPYSL2,E2F1,EEF1A1,EEF2,EIF1AX,EIF2S1,EIF4A1,EIF5,EPRS1,ERBB3,FASN,FOS,FOXO3,FTH1,G6PD,GCLC,GGA2,H3-3A/H3-3B,HK2,Hmga2,HMGCS2,HNRNPU,HSP90…	1573 (18)
	metribolone		chemical reagent		1.199	bias	1.47e-18	ABCC4,ACACA,ACP3,ACSS2,ACTN1,ADSL,ALDH1B1,ALDH9A1,ARL6IP1,ATP1B1,ATP5F1B,ATP5F1C,ATP5MF,ATP5MG,ATP5PD,ATP6AP1,ATP6V0E1,ATP6V1C1,ATP6V1D,ATP6V1G1,B2M,BAX,BCL2,BPGM,CA4,CBR1,CCNA2,CCND1,CCT2,CDKN1A,CDKN1B,CLN6,COX10,COX17,COX4I1,COX5A,COX6B1,COX7A2,COX7A2L,CYC1,DDC,DNAJC10,ECH1,EIF5,ELK4,ELOVL5,EP300,EZR,FASN,FDFT1,FDPS,FH,FHL2,FKBP5,FOS,FOXO1,GALE,GAPDH,GFPT1,GLUD1,GOT2,GRHPR,GRIP1,GRPEL1,GTPBP2,G…	1801 (21)
	Lh		complex	Activated	6.371	bias	1.6e-18	ACP3,ACTB,ACTN1,ADGRG1,ARHGAP35,ARHGEF5,ARNTL,ATP2A2,ATP5IF1,ATP9A,BNIP3L,CAP2,CAPZA1,CARD10,CASP4,CCND2,CREB1,CSNK1A1,CTNNB1,DAPK1,EEF1A1,EEF1B2,EEF1E1,EEF2,EGFR,EIF3F,EZR,FGFR2,FGFR4,FKBP5,FOS,HK2,HSD3B1,ITPR1,JMJD6,JUN,LDLR,MAP1LC3B,MAP2K1,MAP2K3,MAPK14,MAPK6,MCL1,MSMO1,MYC,NLK,NPC2,PAWR,PDXK,PGK1,PHB,PLIN3,POP5,PPIH,PPP2R1A,PPP3R1,PRKAR1A,PRKAR2A,PSIP1,PSMD1,PSMD3,PTPN1,RANGAP1,RASAL2,RPL10,R…	1839 (24)
	l-asparaginase		biologic drug	Inhibited	-5.858	bias	2.1e-18	ASNS,AURKA,AURKB,BARD1,BIRC5,BUB1B,CCNA2,CCNB2,CDCA5,CDK1,CDKN1A,CENPA,CENPH,CENPM,CENPP,CLSPN,E2F7,ERCC6L,FASN,FDPS,INCENP,INSIG1,KIF11,KIF15,KIF22,KIF2C,KIF4A,KIFC1,KNTC1,LDLR,LIG1,MAD2L1,MCM2,MCM3,MCM4,MCM5,MCM6,MSMO1,MTHFD2,MVD,NCAPD2,NCAPH,NDC80,NSDHL,NSL1,NUF2,NUPR1,PCSK9,PHGDH,PLK1,PLK4,POLE,POLE2,PRIM1,PSAT1,RAD51,RAD51AP1,RBL1,RHOC,RMI2,SAA1,SMC2,SPC25,SPDL1,TOP2A,UBE2C
	gentamicin		chemical drug	Activated	4.256		4.42e-18	2610528A11Rik,ABAT,ABI1,AGPAT3,AHCYL1,ALAD,ALCAM,ALDH1A1,AQP1,ARHGAP5,ASL,ASNSD1,ATIC,ATP6V1D,ATP8A2,BAX,BLNK,CA4,CALR,CAND1,CAPZA1,CBS/CBSL,CCND1,CCNG1,CCNL1,CD63,CD9,CDC34,CDK13,CDO1,CEBPB,CHKA,CHORDC1,CIPC,CITED2,CPEB1,CPSF2,CRYL1,CSRP2,CUL2,DDC,DDX50,DMD,DPEP1,DPP4,EED,EEF1A1,EIF2B2,EIF2B4,EIF3B,EIF3D,EPB41L2,EPS15L1,FOS,FTH1,GAS5,GATM,GJB2,GNL3,GSTM5,GTF2H2,GUCA2A,GUK1,H3-3A/H3-3B,HNF4A,HNRN…
	calcitriol		chemical drug	Inhibited	-4.893		7.05e-18	AAAS,ABCB1,ABL1,ACAT2,Acp5,AGPAT5,AKR1B1,AKT1,ANLN,ANXA2,ARHGEF28,ARHGEF3,ATAD1,ATG5,ATIC,ATP5F1D,BAX,BCL2,BCL3,BIRC2,BIRC5,BRCA1,BUB1B,C15orf48,CA2,CCNA2,CCNB1,CCND1,CCND2,CD14,CD44,CDC20,CDC45,CDCA5,CDCA8,CDH1,CDK1,CDKN1A,CDKN1B,CDT1,CEBPA,CEBPB,CEBPD,CENPA,CENPH,CENPM,CENPQ,CHAF1B,Clec2d (includes others),CLMN,COMT,COX17,CSE1L,CYB5R1,CYP3A7,DCTPP1,DDAH1,DICER1,ECH1,ECT2,EGFR,EPHB2,ERBB3,ESPL1,…	1914 (25)
	CCND1	1.49	transcription regulator		1.767		7.35e-18	ABCC4,AHNAK,ATP6V0E1,AURKA,BCL2,BCLAF1,BIRC5,Bmyc,BRCA1,BRWD1,C11orf58,CALU,CBFA2T2,CCNA2,CCND1,CCND2,CD44,CDC45,CDCA2,CDCA7,CDCA8,CDH1,CDK2,CDK4,CDK6,CDKN1A,CDKN1B,CDKN2C,CENPH,CEP55,CLIC6,CLSPN,CPEB1,CPNE3,DNMT1,DONSON,DTL,E2F1,E2F7,E2F8,EEF1B2,EGFR,EIF5,ELAVL1,EPS8,ERI1,FAM120A,FAM204A,FAM83D,FOXM1,G3BP1,GJB1,GPRC5A,HJURP,ID1,ID3,ITGAV,ITGB6,IVD,JKAMP,KIF11,KIF2C,KIF4A,KLHL24,KLK3,LASP1,LCORL,…	1071 (18)
	EGFR	0.649	kinase	Activated	6.92	bias	9.3e-18	ABI1,ACOT7,ACTB,AGO2,AHCTF1,AKT1,ALG9,ATAD3A,AXIN2,B3GALNT2,BAX,BCL2,BIRC5,BTG1,BZW2,CAD,CASP4,CBX5,CCAR1,CCNA2,CCND1,CCT5,CD164,CD47,CD63,CDCP1,CDH1,CDK1,CDK2,CDK4,CDK6,CDKN1A,CDKN1B,CEBPB,CHKA,CLDN2,CLK1,CPM,CTNNB1,CUL1,CUL3,DSC2,DSG2,E2F1,E2F2,EGFR,EIF5A,EPS15,ERBB3,EXOSC5,EXT2,FASN,FOS,GALNT10,GAS5,GRN,HERPUD1,HIRA,HK2,HM13,HMGA1,HNRNPA2B1,HNRNPDL,HNRNPH1,HNRNPK,HOXA7,HSD11B2,HSP90B1,HSPA5,HS…	1979 (22)
	PTEN	0.625	phosphatase	Inhibited	-3.09		1.38e-17	ABCC4,ABHD4,ACACA,AGFG1,AKAP1,AKT1,ALG3,ARHGAP5,ASPH,AURKA,AURKB,BACE2,BAX,BCL2,BCL3,BIRC5,BPGM,BRPF1,BTG1,CA12,CA2,CA8,CAD,CAMK2B,CCNB1,CCNB2,CCND1,CD44,CDC20,CDC25A,CDH1,CDK4,CDK6,CDK9,CDKN1A,CDKN1B,CEBPA,CEBPB,CELSR1,CHD1,CITED2,CKS1B,CKS2,CLDN23,CLTA,CLTC,CNN3,CNNM4,COX5A,CS,CSNK1E,CTDSPL,CTNNB1,CTSZ,CUL4A,DEGS1,DENR,DHFR,DHRS11,DIABLO,E2F1,EED,EGFR,EIF4EBP1,ELOVL6,EP400,EPAS1,ERBB3,Esrra,ETV…	1581 (17)
	camptothecin		chemical drug		0.441		2.79e-17	ABCB1,ABCF2,ADO,AK4,AKAP8,AKT2,ANXA2,ANXA4,APAF1,APBB2,API5,APPBP2,ARAP2,ARFGAP1,ARHGEF1,ASNSD1,AURKA,BAX,BCL11A,BCL2,BFAR,BIRC2,BIRC3,BIRC5,BIRC6,BNIP3L,BRCA1,BRCA2,CAMK2B,CASP2,CASP4,CASP8,CAST,CCNB1,CCND1,CCNG1,CD47,CDC25A,CDC73,CDK1,CDK2,CDK4,CDK6,CDKN1A,CLASP1,CREB1,CSNK1D,CYTH2,DDX39B,DLG1,DPAGT1,E2F1,EEF1A1,EEF1B2,EGFR,ENO3,FAM53C,FCHSD2,FGL2,FLOT2,FNDC3A,FNDC3B,FOS,FOXO1,FUT8,FXN,GAPDH,GA…	1827 (22)
	let-7		microRNA	Inhibited	-7.903	bias	3.39e-17	AGO2,AGO3,ALDH1B1,APC,AURKA,AURKB,BCL11A,BMPR1A,BOP1,BRCA1,BRCA2,BUB1B,Calm1 (includes others),CBFB,CCNA2,CCNB1,CCND1,CCNF,CD44,CDC20,CDC25A,CDC34,CDC45,CDCA2,CDCA3,CDCA5,CDCA7,CDCA8,CDK1,CDK6,CDT1,CEBPD,CKS1B,CLUH,CPSF1,DBF4,DDX18,DDX56,DICER1,DMD,E2F2,E2F6,E2F8,EIF4A1,EIF4G2,EZH2,FBL,GAB2,GALE,GMNN,GTF2I,HBA1/HBA2,HK2,HMGA1,IGF1R,IGF2BP2,LRIG1,LSM6,MAD2L1,MAPK6,MCM10,MCM2,MCM3,MCM4,MCM5,MCM6,MC…	1583 (18)
	CPT1B		enzyme		1.267		3.97e-17	ACACA,ACSS1,AKT1,AKT2,ARAF,ATP2A2,ATP5F1B,ATP5F1C,Atp5k,ATP5MG,ATP5PD,BRAF,CA2,Calm1 (includes others),CBL,COX10,COX17,COX4I1,COX5A,COX6B1,Cox6c,COX7A1,CS,DBI,DGAT2,EGLN3,EIF4E2,EIF4EBP1,EPAS1,FASN,FH,FLOT2,FOXO1,FUBP1,GSK3B,HADHA,HK2,IKBKB,INPP5K,INSIG1,INSR,MAP2K1,MAP2K2,MAPK1,MAPK8,MAPK9,MGLL,MTOR,NDUFA1,NDUFA10,NDUFA4,NDUFA5,NDUFA6,NDUFB10,NDUFB6,NDUFB9,NFKBIA,NRAS,PANK1,PCK1,PCK2,PDE3A,PDPK1…
	geldanamycin		chemical drug	Inhibited	-2.687		5.71e-17	AARSD1,ACACA,AGO1,AGO2,AHSA1,AKR1B1,AKT2,ANXA2,APAF1,ARAF,AURKA,BAX,BCL11B,BCL2,BIN1,BIRC5,CACYBP,CASP8,CCND1,CCNT1,CDC37,CDC5L,CDK1,CDK4,CDK9,CDKN2C,CEBPD,CEP55,CHORDC1,CNP,COX18,CTCF,CUL2,DDX3X,DHX9,DLGAP5,DNAJB1,DNAJC1,DNAJC7,DNMT1,DRG1,EEF1A1,EGFR,EIF1AD,EIF2S1,FASN,FAU,FKBP4,FKBP5,FUNDC2,HLA-DQA1,HLTF,HMGA1,HSF1,HSP90AA1,HSP90AB1,HSP90B1,HSPA5,HSPD1,IGF2R,IKBKB,IRF1,ITGB1,JUN,LSM1,MAP2K2,MAP…	1821 (23)
	EIF2AK3	0.481	kinase	Activated	4.538	bias	7.56e-17	ABCF2,ALDH18A1,APAF1,ARFGAP1,ARFGAP3,ARNTL,ASNS,ATG5,ATP2A2,BET1L,BIRC2,BIRC3,CA9,CANX,CAPN1,CCND1,CEBPB,CEBPG,CLCN3,COG8,CTSC,CYB5R1,DNAJC3,ECD,EIF4EBP1,ELP3,EPRS1,FBXO8,GCH1,GOLGA4,GOLGA5,GOLT1B,GORASP2,HERPUD1,HSPA5,HSPA9,IARS1,ICA1,JUN,KLF4,LARS1,LONP1,MAP1LC3B,MECR,MYC,NAPA,NARS1,NDRG1,NOS2,NUPR1,PCK2,PON2,RAB6A,SARS1,SEC22B,SEC24D,SEC61A1,SEL1L,SHMT2,SLC1A4,SLC35B1,SLC7A1,SPATA5,STX5,SYS1,S…	1664 (22)
Differentiated colonocytes	RICTOR	0.292	other	Inhibited	-9.484	bias	8.66e-67	Atp5e,ATP5F1A,ATP5F1B,ATP5F1C,ATP5F1D,ATP5MC1,ATP5MC2,ATP5MC3,ATP5MF,ATP5MG,ATP5PD,ATP5PF,ATP5PO,ATP6V0A1,ATP6V0A2,ATP6V0B,ATP6V0D1,ATP6V0E2,ATP6V1A,ATP6V1B2,ATP6V1C1,ATP6V1D,ATP6V1E1,ATP6V1F,ATP6V1G1,BIRC5,BSG,CDC42EP5,CFLAR,COX10,COX15,COX17,COX4I1,COX5A,Cox5b/Gm34962,COX6A1,COX6B1,Cox6c,COX7A1,COX7A2,COX7A2L,COX7B,Cox7c,COX8A,CYC1,DAXX,ISG15,MCL1,NDUFA1,NDUFA10,NDUFA11,NDUFA2,NDUFA3,NDUFA4,NDU…	1384 (20)
	torin1		chemical reagent	Inhibited	-5.634	bias	1.44e-62	ACSS2,ADH1C,ALDH1B1,ALDH9A1,ALDOA,ALDOC,ATP5F1B,ATP5MC1,ATP5MF,ATP5MG,ATP5PD,ATP5PF,ATP6V0A2,ATP6V0B,ATP6V0D1,ATP6V0E1,ATP6V0E2,ATP6V1C1,ATP6V1D,ATP6V1E1,ATP6V1F,BPGM,CDH1,CDKN1B,COX10,COX15,COX17,COX4I1,COX5A,COX6B1,COX7A2,COX7B,COX8A,CYC1,DLAT,EEF1A1,EEF1B2,EEF1D,EEF1G,EEF2,EIF3A,EIF3F,EIF3H,EIF4B,ENO1,FASN,GAPDH,GPI,HK1,LDHA,NDUFA1,NDUFA2,NDUFA3,NDUFA6,NDUFA7,NDUFA8,NDUFA9,NDUFAB1,NDUFB2,NDUFB…	1121 (11)
	HNF4A	-2.334	transcription regulator		0.29		2.13e-55	AAMDC,ABCB10,ABCC3,ABHD6,ACAA2,ACAD8,ACAT1,ACIN1,ACLY,ACO1,ACO2,ACOX1,ACOX3,ACP6,ACSS2,ACTN1,ACTR1A,ACTR3,ACY1,ACY3,ADIPOR1,ADPRH,AGA,AHNAK,AIMP1,AIP,AKIRIN2,AKR1C3,ALCAM,ALDH1A1,ALDH1L1,ALDH2,ALDOB,ALKBH6,ALKBH7,ANKRA2,ANXA5,AP3B1,AP3M1,APEH,APH1A,APOB,APP,AQP8,ARFGAP1,ARL1,ARMC1,ARMC8,AS3MT,ASAH1,ATF4,ATF6B,ATOX1,ATP6V1D,ATP6V1F,BDH1,BLOC1S1,BLVRB,BPGM,BPHL,BRD8,BSDC1,C11orf54,C11orf58,C11orf68…	1719 (20)
	MYC	0.321	transcription regulator	Activated	5.818		4.05e-51	ABCB10,ABCC3,ABCF1,ACACA,ACADM,ACAT1,ACLY,ACSS1,ACTB,ACTN1,ADD1,ADIPOR1,ADM,AEBP2,AKAP1,ALCAM,ALDH18A1,ALDOA,ANKRD17,ANXA4,ANXA5,APP,ARAF,Arf2,ARF3,ARHGEF7,ARL6IP1,ARNTL,ASS1,ATAD3A,ATF4,ATP5IF1,ATP6V0B,AXIN1,AZIN1,BCOR,BIRC5,BMPR1A,BOP1,BRD2,C1QBP,CAMK2N1,CANX,CAPN2,CAPNS1,CAST,Ccl6,CCND2,CCNG2,CCT3,CD47,CD9,CDC25A,CDCA7,CDH1,CDK4,CDK7,CDKN1A,CDKN1B,CDX2,CEBPA,CEBPD,CFLAR,CHKA,CHST15,CLDN7,CLPB,…	1345 (18)
	GABA		chemical - endogenous mammalian	Inhibited	-8.615	bias	4.66e-49	ACAA1,ACADM,ACLY,ACTB,ACVR1B,ADCY6,ADH1C,ADI1,ADPRM,AGPS,ALAS1,ANAPC5,AP2A2,Ap2b1,APP,ASAH1,ATP1A1,ATP1B1,ATP2A2,ATP2A3,Atp5e,ATP5F1A,ATP5F1B,Atp5k,ATP6V1E1,Calm1 (includes others),CCND2,CD63,CDKN1B,CEPT1,CHPT1,CKAP4,CLTC,COASY,COX17,COX5A,COX7B,Cox7c,CTBP1,CYP2J2,DCP2,DDX39B,DDX5,DECR2,DHCR24,DLAT,DPM3,EEF1A1,EGLN1,EIF2S2,EIF2S3,EIF3A,EIF4A2,EIF5B,FASN,FOXA2,FUT8,FZD1,GAA,GANAB,GCLM,GLB1,Gm10053…	1255 (18)
	metribolone		chemical reagent	Activated	8.189	bias	4.61e-46	ACAA1,ACACA,ACLY,ACP3,ACSL3,ACSS2,ACTN1,ADH1C,AGR2,ALDH1B1,ALDH9A1,ALDOA,ALDOC,ANKH,APP,ARL6IP1,ATP1B1,ATP5F1B,ATP5F1C,ATP5MC1,ATP5MF,ATP5MG,ATP5PD,ATP5PF,ATP6V0A2,ATP6V0B,ATP6V0D1,ATP6V0E1,ATP6V0E2,ATP6V1C1,ATP6V1D,ATP6V1E1,ATP6V1F,ATP6V1G1,B2M,BPGM,BPNT1,CA4,CAPN5,CCT2,CDKN1A,CDKN1B,CFLAR,COX10,COX15,COX17,COX4I1,COX5A,COX6B1,COX7A2,COX7A2L,COX7B,COX8A,CPT2,CRYZ,CYB561,CYC1,DHCR24,DLAT,DNAJC10,…	1324 (15)
	UQCC3	0.118	other				7.16e-46	ALDOA,ALDOC,ATP13A1,ATP1A1,ATP1B1,ATP2A2,ATP5F1A,ATP5F1B,ATP5F1C,ATP5F1D,ATP5MC1,ATP5MC2,ATP5MC3,ATP5MF,ATP5MG,ATP5PD,ATP5PF,ATP5PO,ATP6V0A1,ATP6V0A2,ATP6V0B,ATP6V0D1,ATP6V0E1,ATP6V1A,ATP6V1B2,ATP6V1C1,ATP6V1D,ATP6V1E1,ATP6V1F,ATP6V1G1,COX10,COX14,COX15,COX17,COX4I1,COX5A,COX6A1,COX6B1,COX7A2,COX7A2L,COX7B,COX8A,ENO1,ENO3,GAPDH,GPI,HK1,NDUFA1,NDUFA10,NDUFA11,NDUFA12,NDUFA13,NDUFA2,NDUFA3,NDUFA4,N…	935 (7)
	TP53	0.486	transcription regulator		0.741		3.96e-44	ABAT,ABCB1,ABCG2,ABHD4,ACAA2,ACADL,ACADM,ACADS,ACAT1,ACLY,ACO1,ACO2,ACOT11,ACSL3,ACSS1,ACSS2,ACTB,ACTN1,ADD3,ADH5,AK3,AK4,AKT3,ALDH18A1,ALDH1A1,ALDH1B1,ALDH4A1,ALDH9A1,ALDOA,ALDOC,ANKH,ANXA2,ANXA4,ANXA8/ANXA8L1,AP1B1,AP3B1,APBB2,API5,APP,ARAP2,AREG,ARHGAP1,ARL6IP1,ARRB1,ASL,ASS1,ATF4,ATG2B,ATG4B,ATG7,ATP1A1,Atp5e,ATP5F1A,ATP5F1C,Atp5k,ATP5MC1,ATP5MC3,ATPAF2,ATXN1,BAK1,BAP1,BCAP31,BIRC3,BIRC5,BOP1…	1572 (23)
	MLXIPL	-0.808	transcription regulator	Activated	8.278	bias	3.58e-43	ACACA,ACLY,ACSS2,ADIPOR2,AGPS,ANXA2,CEBPA,CPT1A,DHRS7B,ELOVL6,FASN,GNPAT,HMGCR,HMGCS2,MID1IP1,NR1D1,PGD,PNPLA2,PPARG,RPL10,RPL10A,RPL11,RPL12,RPL13,RPL13A,RPL15,RPL17,RPL18,RPL18A,RPL21,RPL22,Rpl22l1,RPL23,RPL24,RPL26,RPL27,RPL27A,RPL28,Rpl29 (includes others),RPL3,RPL30,RPL31,Rpl32,RPL35,RPL35A,Rpl36,Rpl36a,RPL37,RPL37A,RPL38,RPL39,RPL4,RPL41,RPL5,RPL6,RPL7,RPL7A,RPL7L1,RPL8,RPL9,RPLP0,Rplp1 (in…	985 (7)
	LARP1		translation regulator	Inhibited	-7.94	bias	1.23e-39	EEF1A1,EEF1B2,EEF1D,EEF1G,EEF2,EIF3A,EIF3F,EIF3H,EIF4B,PABPC1,RACK1,RPL10,RPL10A,RPL11,RPL12,RPL13,RPL13A,RPL15,RPL17,RPL18,RPL21,RPL22,RPL23,RPL24,RPL26,RPL27,RPL27A,RPL28,RPL3,RPL30,RPL31,RPL35,RPL35A,RPL37,RPL37A,RPL38,RPL39,RPL4,RPL41,RPL5,RPL6,RPL7,RPL7A,RPL8,RPS11,RPS12,RPS13,RPS14,RPS15,RPS16,RPS18,RPS19,RPS2,RPS20,RPS21,RPS23,RPS24,RPS25,RPS27A,RPS28,RPS29,RPS3,RPS5,RPS6,RPS7,RPS8,RPS9,TP…
	CPT1B		enzyme	Inhibited	-4.382		2.17e-34	ACACA,ACADL,ACADM,ACSS1,AKT3,ARAF,ATP2A2,Atp5e,ATP5F1A,ATP5F1B,ATP5F1C,Atp5k,ATP5MG,ATP5PD,CA2,Calm1 (includes others),CBL,COX10,COX15,COX17,COX4I1,COX5A,COX6B1,Cox6c,COX7A1,COX7B,CS,DBI,DGAT2,EGLN3,EIF4E2,EIF4EBP1,EPAS1,EXOC7,FASN,FH,FLOT1,FOXO1,FUBP1,GRB2,HADH,HADHA,HK1,INSIG1,INSR,LPL,MAP2K1,MAPK3,MAPK9,MGLL,MKNK2,MTOR,NDUFA1,NDUFA10,NDUFA2,NDUFA3,NDUFA4,NDUFA5,NDUFA6,NDUFA7,NDUFA8,NDUFA9,NDUF…
	acyline		biologic drug				8.24e-34	EEF1A1,EEF1B2,EEF2,EIF3F,EIF3H,HMGCR,HSD17B7,JUN,JUNB,LDLR,MAFB,NOS2,OCLN,PIM3,RPL10,RPL10A,RPL12,RPL13,RPL13A,RPL15,RPL17,RPL18A,RPL21,RPL23,RPL24,RPL26,RPL27,RPL27A,RPL28,Rpl29 (includes others),RPL3,RPL30,RPL31,Rpl32,RPL35,RPL35A,Rpl36,Rpl36a,RPL37,RPL39,RPL5,RPL6,RPL7,RPL8,RPL9,RPLP2,RPS10,RPS11,RPS13,RPS15,RPS16,RPS17,RPS18,RPS19,RPS2,RPS20,RPS23,RPS24,RPS25,RPS26,Rps27/Rps27rt,RPS28,Rps3a1,…	328 (4)
	lipopolysaccharide		chemical drug	Activated	6.546	bias	4.44e-29	1810058I24Rik,ABCB1,ABCB10,ABCC3,ACAA2,ACAD8,ACADL,ACADM,ACLY,ACO1,ACSS2,ADM,ADRA2A,AEBP2,AHNAK,AIG1,AK4,AKR1A1,ALCAM,ALDH2,ALDOA,ALDOC,AMPD3,ANXA2,ANXA5,API5,APOB,Apol11b (includes others),APOL6,Apol7e (includes others),APP,AQP4,AREG,Arf2,ARFGAP3,ARHGAP1,ARHGEF3,ASS1,ATF4,ATG7,ATP1A1,ATP2A2,ATP5MC1,ATP6V0D1,ATRX,B2M,BAG3,BCL10,BCL9,BIRC3,BLNK,Brd4,Calm1 (includes others),CALR,CAPG,CAPN2,CARHSP1,…	1147 (17)
	CTNNB1	0.469	transcription regulator		0.183	bias	2.18e-28	ABCB1,ACAA1,ACACA,ACADL,ACADS,ACAT1,ACAT2,ACLY,ACTB,ACTR3,ADAM17,Akr1c14,ALCAM,ALDH1A1,ALDH3A2,ALG3,Ang4,APP,AQP4,ARFGAP3,ARHGDIA,ATP5MC2,ATP5MC3,ATP5PO,ATP6V0A1,BCAP31,BCL9,BIRC5,BTF3,CA9,CAPN1,CAPNS1,CASP7,CCL5,CCND2,CD47,CDH1,CDK7,CDKN1A,CDKN1B,CDX2,CEACAM1,CEBPA,CELSR1,CNN2,COX4I1,COX5A,CPT1A,CPT2,CRIP1,CTDSPL,CTNNB1,Cux1,CXCL6,CYB5A,CYC1,Cyp2d9 (includes others),CYP4F12,CYP51A1,DDX17,DDX50,D…	1462 (21)
	arsenic trioxide		chemical drug		0.107		3.37e-28	ACAT2,ARID3A,ARL6IP1,ATF4,ATP1B1,ATP5F1D,ATP5MC2,ATP5MC3,ATP6V0B,ATP6V0D1,ATP6V1A,ATP6V1C1,ATP6V1F,BACH1,BCAP31,BCL2L14,BLVRB,CALR,CASP7,CDKN1A,CFLAR,COPB2,COX6B1,COX7A2,COX7A2L,COX7B,CTH,CTNNB1,CYC1,CYP51A1,DEDD2,DHCR24,DNAJB11,DNAJC10,DNMT3A,EBP,ECD,EPAS1,FADS1,FASN,FDFT1,FDPS,FDX1,FECH,FTH1,GCLC,GCLM,HBA1/HBA2,HMGCR,HMGCS1,HSBP1,HSP90AB1,HSPE1,IFRD1,IRF1,ITGB1,KAT7,KCNQ1,KDELR1,KEAP1,LAMTOR3,L…	1282 (22)
	TLE3	-1.153	other				8.7e-28	Atp5e,ATP5F1A,ATP5F1B,ATP5F1C,ATP5F1D,Atp5k,ATP5MC3,ATP5MF,ATP5MG,ATP5PD,ATP5PF,ATP5PO,COQ10B,CYC1,CYCS,ETFA,ETFDH,NDUFA1,NDUFA10,NDUFA11,NDUFA12,NDUFA13,NDUFA2,NDUFA3,NDUFA5,NDUFA6,NDUFA7,NDUFA8,NDUFA9,NDUFAB1,NDUFAF3,NDUFAF4,NDUFB11,NDUFB2,NDUFB3,NDUFB4,NDUFB5,NDUFB6,NDUFB7,NDUFB9,NDUFC1,NDUFC2,NDUFS1,NDUFS2,NDUFS3,NDUFS4,Ndufs5,NDUFS6,NDUFV1,NDUFV2,NDUFV3,UCP2,UQCR11,UQCRB,UQCRC1,UQCRC2,UQCRFS…
	MYCN	0.334	transcription regulator	Activated	4.937		8.87e-28	ABCB1,ABCB10,ABCC3,ABCF1,ABCG2,ACTB,ACTG1,AEBP2,ALDH1A1,ALDOA,ATXN2,B2M,BIRC5,CCND2,CCNG2,CCNT1,CDK7,CDK9,CDKN1A,CDKN1B,CITED2,CKAP4,DNMT3A,E2F2,E2F5,EEF1A1,EEF1D,EEF1G,EEF2,EGFR,EIF3C,EIF5A,EMP1,EZH1,FBXO36,FOXA2,GAPDH,GATA6,GRB2,HLA-A,HLA-DQB1,HMGA1,HSP90AB1,HSPD1,ITGA3,ITGB1,JARID2,JUNB,KDM5B,KLK3,LDHA,MXI1,MYH9,NACA,NDRG1,NME2,NPM1,ODC1,PDIA4,PDK1,PGRMC2,PHB,PSMA7,PSMB6,PTK2,PTPRK,RAB3D,RBBP4…	1401 (19)
	methylprednisolone		chemical drug		0.349		1.35e-27	ABAT,ADAM17,ADCY6,AK4,Akr1c12/Akr1c13,AKR1C3,AKR7A2,ALAD,ALAS1,ALDH1A1,ALDH3A2,ALDOB,Anp32a,ANXA2,AP2A2,AQP8,ARNTL,ARSB,ASAH1,ASPA,ASS1,ATIC,ATP1A1,ATP1B1,ATP2A2,ATP5F1C,ATP5IF1,ATRN,AZIN1,B2M,B4GALNT1,BDH1,BLNK,C1QBP,Calm1 (includes others),CAMK1D,CD38,CD74,CD9,CDH1,CDKN1A,CELA1,CITED2,CLDN3,CLDN7,CNN3,CNP,COMT,COX6A1,CROT,CSNK2B,CTSC,CTSH,CTSS,CTSV,CYB5B,Cyb5r3,CYC1,CYCS,CYLD,DAB2IP,DDIT4,DGKZ,…	1394 (18)
	beta-estradiol		chemical - endogenous mammalian	Activated	4.176	bias	1.62e-27	2010016I18Rik,ABCB1,ABCB10,ABCG2,ABL1,ACAA1,ACAA2,ACADM,ACOX1,ACP3,ACTB,ACTG1,ADH1C,ADM,AFF4,AKAP1,AKT1S1,AKT3,ALCAM,ALDH18A1,ALDH2,ALDH3A2,ALDH4A1,ALDOA,ALG3,ALG5,Ang4,ANKH,ANO1,Anp32a,ANXA2,ANXA4,AP1B1,AP1G1,AP1S1,AP3D1,APP,ARAF,AREG,ARF5,ARHGEF12,ARPC4,ARSB,ASAH1,ASS1,ATF5,ATP1B1,ATP5F1B,ATP5MC2,ATP5PD,ATP6V1F,ATRX,ATXN3,BACE2,BAK1,BCL10,BIRC3,BIRC5,BLNK,BMPR1A,BOP1,BSG,BTG2,C15orf48,C1QBP,C2o…	1662 (19)
	MAPT	0.411	other		0.447		1.69e-27	ABCG2,ACAT1,ACLY,ACO2,ACTB,ACTG1,ACTN1,ACTR1A,ADD1,ALDOA,Anp32a,ANXA5,AP1B1,APP,ARF1,Arf2,ARF4,ARF5,ARF6,ATOX1,ATP1B1,Atp5e,ATP5F1A,ATP5F1B,ATP5F1C,ATP5F1D,ATP5PD,ATP5PF,ATP6V0D1,ATP6V1A,ATP6V1E1,BSG,C1QBP,CANX,CAPG,CAPN1,CAPN2,CAST,Ccl6,CD63,CD74,CD9,CDK5,CDKN1A,CDKN1B,CEBPB,CKMT1A/CKMT1B,CLTA,CLTC,COX4I1,COX5A,Cox6c,COX7A2,CS,CTSC,CTSD,CTSS,CYCS,DBI,DCTN1,DLG1,DSTN,DYNLL2,EEF1G,EEF2,EIF4A2,ENO1…	1440 (20)
	mono-(2-ethylhexyl)phthalate		chemical toxicant	Activated	6.466	bias	2.19e-27	ACADL,ACADM,ACAT2,ACO1,ACO2,ACOX1,ADIPOR2,ALDOC,ATP5F1B,ATP5F1D,BSCL2,CCND2,CDK4,CEBPA,COX4I1,COX6A1,COX7A2,CPT2,CS,CYC1,DDIT4,DGAT2,ECHS1,ENO1,Esrra,FADS1,FASN,FH,G6PD,GAPDH,GFPT1,Gk,GNPNAT1,GPI,HADH,HADHA,HIPK2,IDH3A,IDH3G,IER2,JUNB,KIF5B,LDLR,LPL,MDH1,MDH2,MED1,N4BP1,NDUFA10,NDUFA2,NDUFB5,NDUFB9,NDUFS1,NDUFS2,NDUFV1,NDUFV2,NFIB,NFKB1,OGDH,PC,PDHB,PDK1,PGK1,PLIN2,PPARD,PPARG,PPARGC1B,RSRP1,SC5D…	1225 (19)
	Lh		complex	Activated	6.01	bias	3.19e-27	ACP3,ACTB,ACTN1,AREG,ARHGAP1,ARHGAP35,ARNTL,ARPC1A,ARPC4,ATP2A2,ATP5IF1,CAP2,CARD10,CASP4,CCND2,CD55,CDC42EP4,CDK16,CDK5,CFLAR,CTNNB1,CTNND1,DHRS3,EEF1A1,EEF1B2,EEF2,EGFR,EIF3F,EIF3H,EZR,FDX1,FDXR,FKBP5,GNAS,HMGCR,HSD17B7,HSD3B1,ITGA3,ITGB5,JUN,JUNB,KRT18,LDLR,MAFB,MAP1LC3B,MAP2K1,MAP3K5,MAPK14,MAPK6,MCL1,MSMO1,NPC2,PGK1,PHB,PI4K2A,PIM3,PLIN3,PPP2R1A,PRKACA,PRKAR1A,PRKAR2A,PTP4A1,PTPN1,RAB5C,RHOB…	1177 (18)
	CD 437		chemical drug	Inhibited	-6.341	bias	6.86e-27	ALDOA,API5,ARF1,ATP5F1A,ATP5F1B,ATP5F1C,ATP5MC3,ATP5MG,ATP5PF,ATP5PO,BANF1,CCL5,CCT2,CCT3,CDK4,CDKN1A,CEBPB,CLIC1,COX7A2,COX7A2L,COX7B,EEF2,EIF3G,EIF3I,EIF4A2,EIF4B,EIF5A,ENO1,ERH,F3,FKBP5,FTH1,FTL,GNAS,HADHA,HNRNPC,IMP3,INO80B,ITM2B,JUN,KARS1,MEN1,MGST1,MOB1A,NACA,NARS1,NDUFB9,NFKBIA,NPM1,ODC1,PABPC1,PCBP1,PFN1,PHYH,PNPLA6,POLR2G,PSMA4,PSMF1,RBMX,RPL10,RPL11,RPL13,RPL13A,RPL24,RPL39,RPL8,RPLP2,R…	1226 (17)
	dexamethasone		chemical drug		0.985		2.17e-26	AACS,ABCB1,ABCC3,ABHD2,ACACA,ACADL,ACADM,ACADS,ACAT1,ACLY,ACOT7,ACOX1,Acp5,ACSL3,ACSS2,ACTB,ACTG1,ACTR3,ACY3,ADAM10,ADAM15,ADAM17,ADAM9,ADM,ADRA2A,Akr1c14,AKR1C3,ALAS1,ALCAM,ALDH18A1,ALDH1A1,ALDH1B1,ALDH1L1,ALDH2,ALDH4A1,ALDOB,AMPD3,ANO1,AP1G1,Ap2b1,AP3S1,APOL6,APP,AREG,ARHGAP17,ARHGDIA,ARMC8,ARRB1,ATF4,ATG4B,ATP1A1,ATP1B1,ATP2A2,ATP5F1D,ATP5MC1,ATP5MC2,ATP6V1B2,ATP6V1C1,AUH,B2M,BAK1,BIRC3,BIRC5,…	1289 (19)
	5-fluorouracil		chemical drug	Inhibited	-5.99		1.02e-25	ABAT,ABHD4,ACOX3,ACVR1B,ALDOA,ANKRA2,ANXA2,ANXA4,ATF4,ATG5,ATP5F1B,ATP5F1C,ATP5PO,BAK1,BIRC5,BTF3,BTG2,CALU,CANX,CAPNS1,CCND2,CCT3,CD81,CD82,CDH1,CDKN1A,CFLAR,COPS8,COX6A1,COX6B1,COX8A,CSTB,CTSD,CYCS,DCXR,ECHS1,EEF1G,EEF2,EIF2S2,EIF3C,EIF3G,EPHA2,FDPS,FDXR,FOXO1,GAPDH,GARS1,GOT2,GTF2I,HADHA,HNRNPA2B1,HNRNPC,HSP90AB1,HSPA4L,HSPE1,IARS1,IDH2,JUN,KARS1,KLHL22,LCN2,LDHA,MCL1,MDH1,MTA1,MXD1,MXD4,NACA,…	1292 (18)
	CLPP	-0.14	peptidase	Inhibited	-6.638	bias	5.4e-25	ACADL,ACADM,ACADS,ACO2,ALAS1,ALDH2,ALDOA,ATP5F1A,ATP5F1B,CS,CYC1,DECR1,DLAT,DLST,ECI1,ENO1,ETFA,ETFDH,FH,GAPDH,HADH,HADHA,HADHB,HSPD1,IDH2,IDH3A,IDH3B,IDH3G,IFIT1B,ISG15,MDH2,OGDH,PC,PDHA1,PDHB,PHB,PHB2,PRDX3,SAMM50,SDHA,SDHB,SDHC,SLC25A11,SOD2,STAT1,SUCLA2,SUCLG1,TFAM,TKT,TUFM,UQCRC1,USP18
	INSR	0.125	kinase	Activated	5.009	bias	9.43e-25	ACAA2,ACADL,ACADM,ACADS,ACO2,ADIPOR2,AGR2,ALAD,ALDH1A1,ALDH2,Ang4,Anp32a,AREG,ARHGDIA,ATP1A1,ATP1B1,ATP2A2,ATP2A3,ATP5F1A,ATP5F1B,ATP5F1D,ATP5MC1,ATP5MC3,ATP5MF,ATP5MG,ATP5PD,ATP5PF,ATP5PO,BIRC5,C2,Calm1 (includes others),CAPN10,CASP6,CCND2,CCNG2,CDC5L,CDKN1A,CDX2,CEBPA,CEPT1,CERS6,Ces1f,CITED2,CKMT1A/CKMT1B,COX4I1,Cox5b/Gm34962,CPT1A,CPT2,CS,CSTB,CTSB,CTSV,CYC1,CYCS,CYP51A1,DECR1,DEK,DGAT2,ECHS1…	1428 (23)
	ESR1	1.398	ligand-dependent nuclear receptor		1.038		3.11e-24	ABCB1,ABCC3,ABCG2,ABHD2,ABI2,ACACA,ACLY,ACOX1,ACVR1B,ADAM17,ADD3,ADH1C,AGGF1,AHNAK,AKAP1,AKT1S1,ALCAM,ANAPC5,ANXA4,AP1G2,AP1S1,AP3B1,ARAF,AREG,ARFGAP1,ARHGAP1,ARHGAP18,ARHGEF11,ARHGEF7,ARNTL,ARRB1,ASS1,ATF5,ATOX1,ATP1B1,ATP2A3,Atp5e,ATP6V0D1,ATP6V1A,BET1L,BIRC3,BIRC5,BRWD1,CA12,CA2,CALML4,CAMK2B,CAP2,CAPN2,CASP6,CBL,CBLC,CCNG2,CCNT2,CD55,CD74,CDC42BPA,CDC42EP2,CDC42EP3,CDC42SE1,CDC42SE2,CDC5L,CDH…	1436 (20)
	KRAS	-0.38	enzyme		0.287		2.34e-23	ACLY,Acp5,ACTR3,ACY1,AHNAK,Akr1c14,ALDOA,ALDOC,AMPD3,ANXA8/ANXA8L1,APLP2,APP,AREG,ATAD3A,ATF5,ATG5,ATG7,ATP1B1,B2M,BAK1,BCL2L14,BDH1,BIRC3,BIRC5,BSG,CCT5,CD74,CDH1,CDK4,CDK7,CDKN1A,CDKN1B,CEACAM1,CEBPB,CFTR,CLPTM1,CRYZ,CS,CSF2RA,CTNNB1,CXADR,CXCL6,CYP2J2,DDAH1,DDR1,DECR2,DNMT3A,DUSP6,E2F5,EEF1A1,EFNA1,EGFR,EI24,EIF3I,EIF5,EIF5A,ENO1,EPHA2,EPHB4,EXOSC5,EXT2,F3,FASN,FLII,FTH1,G6PD,GALNT1,GALNT10,GA…	1314 (18)
	POR	-0.5	enzyme	Inhibited	-4.789		7.51e-23	ABCC3,ACADL,ACAT2,ACER1,ACLY,ACTG1,Akr1c14,ALDH1A1,ANXA5,AQP8,ATF5,BDH1,C11orf54,CD74,Ces2a,Ces2c,CHMP4C,CLDN3,CPT1A,CPT2,CYB5B,CYP51A1,DHCR24,ECI1,EHHADH,ELOVL5,ELOVL6,FABP2,FADS2,FDFT1,FDPS,GBP2,GPHN,GSTA3,GSTA5,GSTM1,Gstm3,GSTM5,Gstm6,Gstt3,HADHB,HLA-A,HLA-DMA,HLA-DQA1,HLA-DQB1,HLA-DRB5,HMGCR,HMGCS1,HSD17B10,HSD17B11,HSD17B12,HSD3B1,HSPH1,IHH,INSIG1,LDLR,LGALSL,LPL,LSS,MSMO1,Mt1,MVD,MVK,Naip1 …
	sirolimus		chemical drug	Inhibited	-5.015		8.14e-22	ACACA,ACADM,Acp5,ACTB,ADM,AGR2,ANXA5,APP,ARF1,ASS1,ATF4,ATG7,ATP1A1,ATP5F1C,ATP5MC1,ATP5MG,ATP6V0B,ATP6V1A,ATP6V1B2,ATP6V1D,ATP6V1G1,B2M,BIRC5,CCND2,CDC25A,CDK4,CDKN1A,CDKN1B,CEBPA,CEBPB,CFLAR,CLIC1,COX6A1,COX6B1,CYCS,DAD1,DDIT4,DDT,EEF1A1,EEF2,EIF2S1,EIF5,ENO1,EPRS1,F3,FASN,FTH1,G6PD,GCLC,GSTP1,H3-3A/H3-3B,HMGCS2,HSP90AB1,HSPA4,HSPD1,HTT,IDH1,IGF1R,IL4R,INSR,IRF9,ISG15,JUN,JUNB,LCN2,LDHA,LMNA,LP…	1390 (20)
	1,2-dithiol-3-thione		chemical reagent	Activated	3.726	bias	1.11e-21	ABCC3,ACAA1,ACTG1,AKR1A1,ALAS1,ALDOA,ARF1,ATP1A1,B4GALNT1,CCT3,CELA1,CTSD,CUL1,DAD1,DDX39B,DDX50,DNAJB11,DNAJC3,DSTN,EIF2S1,EIF3C,EIF3G,EIF6,EPB41,EPHB4,ESD,ETV6,FKBP5,FTH1,GCLC,GCLM,GNA11,GNA14,GSTA3,Gsta4,GSTA5,GSTM1,Gstm3,GSTM5,GSTP1,GSTT2/GSTT2B,HACD3,HMBS,HSD3B1,HSP90AB1,HTATIP2,LMNA,LPL,LY6E,M6PR,MGLL,MORF4L2,MSMO1,NARS1,NFE2L2,NOCT,NQO1,P2RX4,PCBP1,PDIA4,PDIA6,PRDX1,PSAT1,PSMA1,PSMA2,PSMA4…	918 (11)
	PTEN	0.222	phosphatase		0.751		3.7e-21	ABHD4,ACAA1,ACAA2,ACACA,ACO2,ACOX1,ADM,AKAP1,Akr1c12/Akr1c13,AKR1C3,ALG3,ARF4,ARHGDIA,ATP5F1A,ATP5MC1,BACE2,BIRC5,BPGM,BRPF1,BTG2,CA12,CA2,CAMK2B,CASP7,CCL5,CDC25A,CDH1,CDK4,CDK9,CDKN1A,CDKN1B,CEBPA,CEBPB,CELSR1,CHD1,CITED2,CLDN23,CLTA,CLTC,CNN3,CNNM4,COX5A,COX8A,CS,CTDSPL,CTNNB1,CTSB,CTSV,CUL4A,CYB561,DEGS1,DENR,DHRS11,DIABLO,DLAT,DYNC1LI2,EBP,EGFR,EHHADH,EIF4EBP1,ELOVL6,EP400,EPAS1,Esrra,ETS2,E…	1372 (20)
	uranyl nitrate		chemical toxicant	Activated	2.428		6.11e-21	ACADS,ADH1C,AIMP1,ATP5F1B,ATP5IF1,Atp5k,CA4,Calm1 (includes others),CANX,CD74,Clec2d (includes others),CRYZ,CYCS,Cyp2d9 (includes others),CYP4B1,EEF2,ESD,FTL,GAS6,GLRX3,GLUD1,GPI,HNRNPA2B1,HSPD1,LAMP2,Mt2,NDRG1,NDUFA1,NDUFB9,NME2,NUDT19,ODC1,PDHA1,PEBP1,PHYH,PIM3,PRDX1,PRDX2,RAB5C,RACK1,RIDA,RPL10A,RPL23,RPL27,RPL7,RPL9,Rplp1 (includes others),RPS16,RPS24,RPS26,RPS29,RPS8,SLC35B1,SOD1,STARD10,TAG…
	NFE2L2	0.274	transcription regulator	Activated	5.111	bias	1.05e-20	ABCC3,ABCG2,Acp5,ACSS2,ACTG1,AKR1A1,AKR7A2,ALAS1,ALDOA,APPBP2,ARF1,ARHGEF3,ATF4,ATP1A1,B4GALNT1,Calm1 (includes others),CAT,CCL5,CCT3,CDH1,CDKN1A,CEBPA,CELA1,Ces1g,CHGB,COX4I1,CS,CTSD,CUL1,CXCL6,DAD1,DCTN3,DDX39B,DDX50,DNAJB11,DNAJC3,DSTN,EIF2S1,EIF3C,EIF3G,EPAS1,EPB41,EPHB4,ESD,ETV6,FKBP5,FTH1,FTL,G6PD,GCLC,GCLM,GLUD1,GNA11,GNA14,GPX1,GPX2,GSTA3,Gsta4,GSTA5,GSTM1,Gstm3,GSTM4,GSTM5,Gstm6,GSTO1,GS…	996 (14)
	pirinixic acid		chemical toxicant	Activated	5.758	bias	1.4e-20	AADAC,ABCC3,ABCG2,ACAA1,ACAA2,ACACA,ACADL,ACADM,ACADS,ACAT1,ACAT2,ACOT8,ACOX1,ACSS2,ADH1C,ADIPOR1,ADIPOR2,AKR1C3,ALAS1,ALDH3A2,ALDH9A1,ALDOC,ANXA2,AP3M1,ASL,BPGM,BSG,CAT,CCL5,CCNT1,CCT3,CD63,CDK4,CDKN1A,CDKN1B,CEACAM1,CFH,CPT1A,CPT2,CTSB,CYP2C9,CYP2J2,CYP3A7,DAD1,DBI,DECR1,DECR2,DLAT,ECI1,EGFR,EHHADH,ELOVL5,ELOVL6,ETFDH,F3,FABP2,FADS1,FADS2,FASN,G6PD,GAPDH,Gk,GLCE,GLUL,GOT2,GRPEL1,GRPEL2,GSTM3,HA…	1165 (16)
	ST1926		chemical drug	Inhibited	-6.063	bias	1.51e-20	ACTB,ARF1,ATP5F1A,ATP5F1B,ATP5PF,CCT2,CCT3,CDK4,CDKN1A,CEBPB,CHCHD2,CLIC1,COX7A2,COX7A2L,COX7B,EEF2,EIF3G,EIF3I,EIF4A2,EIF4B,EIF5A,ENO1,FKBP5,GNAS,IMP3,ITM2B,KARS1,MEN1,MGST1,MOB1A,NACA,NARS1,NDUFB9,NPM1,ODC1,PABPC1,PFN1,POLR2G,PSMA4,PSMF1,RPL10,RPL13,RPL18A,RPL24,RPL39,RPL41,RPL6,RPL8,RPS10,RPS15,RPS2,RPS26,RPS27A,SAP18,SLC25A3,SLC30A5,SNRPB,SNRPD2,SOD1,SSR2,ST13,TBL1XR1,TIMM8B,TMEM14C,TMEM258,T…
	HBA1/HBA2	-0.636	transporter	Activated	4.564	bias	1.52e-20	ATP5F1C,ATP5MC1,ATP5MC2,ATP5MF,ATP5PO,COX15,COX19,Cox6c,COX8A,CYC1,EGLN3,Mt1,NDUFA11,NDUFA13,NDUFA3,NDUFA4,NDUFA5,NDUFA6,NDUFA7,NDUFA9,NDUFB11,NDUFB4,NDUFB7,NDUFB8,NDUFB9,NDUFC1,NDUFS3,NDUFS4,NDUFS8,NDUFV1,NDUFV2,SDHA,UCP2,UQCRC1,UQCRC2
	NR4A1	-0.944	ligand-dependent nuclear receptor	Inhibited	-2.312		1.64e-20	ACACA,ACLY,ACO1,ACO2,ADIPOR2,ADM,ALDOA,ALDOB,APOB,ATP5F1A,ATP5F1B,ATP5MC3,ATP5PF,BIRC5,BPGM,CCL5,CCND2,CDKN1B,CEBPA,COX6A1,COX6B1,COX7A2,CTNNB1,CTNND1,DFFA,DLAT,DLST,EHHADH,ENO1,ENO3,FASN,G6PC3,G6PD,GALM,GPI,GSTM5,GYS1,HDAC1,HMGCR,IDH2,IDH3A,IKZF2,ITGB1,JUP,KITLG,KRT18,KRT8,LDLR,LPIN1,LPL,Ly6a (includes others),LY6E,MARCKSL1,MDH1,MDH2,MED1,Mt1,NDUFA1,NDUFA10,NDUFA3,NDUFA6,NDUFA7,NDUFB3,NDUFB4,NDU…	1430 (21)
	elaidic acid		chemical - endogenous mammalian	Activated	5.213	bias	1.89e-20	ACACA,ACAT2,ACLY,ACOX1,ACSL3,ADIPOR1,ALDH1A1,ATP5F1A,ATP5F1B,CD9,CEBPA,CYB5B,CYP51A1,DBI,DGAT2,DHCR24,DHRS3,DLAT,EBP,ECI1,ELOVL6,FADS1,FASN,FDFT1,FDPS,GNE,HMGCR,HMGCS1,HSD17B12,HSD17B7,LCN2,LDLR,LIPH,LPIN1,LPP,LSS,MVK,NPC2,NSDHL,PCSK9,PCYT2,PPT1,SC5D,SCD,SCNN1A,SGPL1,SLC51A,SOAT1,SQLE,SREBF2,STX12,SUCLG2,TTR,YWHAH	200 (3)
	MAP4K4	-0.203	kinase	Inhibited	-5.78	bias	2e-19	ACAA2,ACACA,ACADS,ACLY,ACO2,ALDH4A1,ARAF,ATP6V0A2,ATP6V0E1,AUH,Calm1 (includes others),CEBPA,CEBPB,CHPT1,COQ5,COX10,CYC1,DLAT,DLST,EIF4E2,FAR1,FASN,GLUL,GYS1,HADH,HADHA,HADHB,HMGCL,IVD,MAFB,MGLL,MPI,NDUFA11,NDUFA3,NDUFA5,NDUFAB1,NDUFB7,NDUFS1,NDUFS4,NDUFS8,NDUFV1,OGDH,PAPSS2,PEX16,PEX19,PGM1,PHYH,PI4K2B,PIGO,PON2,PPARG,PRKAR2A,PTDSS2,PTS,SCD,SREBF1,ST3GAL4,SUCLG1,UCK1,UQCRC1,UQCRFS1	1425 (19)
	YAP1	-0.016	transcription regulator		0.286	bias	3.11e-19	ACACA,ACAT1,ACAT2,ACLY,ACTG1,AREG,BIRC5,CCL5,CDC42EP3,CDH1,CDKN1A,CDKN1B,CDX2,CIT,CPT1A,CPT2,CTNNB1,DDAH1,EGFR,FASN,FSHR,GAB1,HMGCR,HMGCS1,HMGCS2,IFIT1,IGF1R,LDHA,LMNA,LPL,MYH9,NDUFB3,NDUFS8,NF2,NLRC4,NOS2,NUAK2,OCLN,OXNAD1,PPP1R3B,PTEN,RPL10,RPL10A,RPL11,RPL12,RPL13,RPL13A,RPL15,RPL17,RPL18,RPL18A,RPL21,RPL22,Rpl22l1,RPL23,RPL24,RPL26,RPL27,RPL27A,RPL28,Rpl29 (includes others),RPL3,RPL30,RPL31,R…	1527 (22)
	imatinib		chemical drug		-1.846		4.41e-19	ABL1,APP,ARID3A,ARL6IP1,ATP1B1,ATP5F1D,ATP5MC2,ATP5MC3,ATP6V0B,ATP6V0D1,ATP6V1A,ATP6V1C1,ATP6V1F,BCAP31,BCL2L14,BIRC5,BIRC6,BLNK,CALR,CAPN1,CASP7,CCND2,CDKN1A,CDKN1B,CEBPA,CEBPB,CFLAR,CHD1,CITED2,COPB2,COX6B1,COX7A2,COX7A2L,COX7B,CTNNB1,CYC1,DEDD2,DNAJB11,DNAJC10,ECD,EIF4B,EPAS1,FECH,HBA1/HBA2,HSBP1,HSP90AB1,HSPE1,IDO1,Ifi47,IFRD1,IGKC,Igtp,IRF1,KAT7,KDELR1,LAMTOR3,LMAN2,LSM10,LYN,MADD,MAP2K4,MAP…	1477 (21)
	PRL	18.017	cytokine	Activated	4.14	bias	1.04e-18	ABCG2,ACTB,ACTR3,AKR1C3,ANXA2,ANXA5,APP,ARF3,ATP2A2,ATP5PD,B2M,CAMK2N1,CAPN2,CDH1,CDK4,CDKN1A,CEBPD,CLDN3,CNN3,COX4I1,CPD,CTSA,CTSB,CTSD,CTSH,CTSS,CTSV,DDX39B,DHX58,DTX3L,EGFR,ENO1,EPSTI1,GSTM1,HELZ2,HERPUD1,HSD11B2,HSD17B7,HSPD1,IFI35,IFIH1,IFIT1,IRF1,IRF9,ISG15,JUN,KRT14,KRT19,LY6E,MAFG,MAGED1,Marcks,Meg3,MEN1,MGST1,MICOS10-NBL1/NBL1,MLKL,N4BP1,NFKB1,NOS2,OAS1,OAS3,OCLN,ODC1,PAQR8,PARP10,PARP12…	1305 (20)
	PPARA	-0.225	ligand-dependent nuclear receptor	Activated	2.712		1.25e-18	AADAC,ACAA1,ACAA2,ACACA,ACADL,ACADM,ACADS,ACAT1,ACAT2,ACOT8,ACOX1,ACSS2,ADAM10,ALDH2,ALDH3A2,ALDH9A1,ALDOB,ANAPC5,ANXA2,APP,AQP8,ARHGDIA,ASL,ASS1,ATP5F1B,C2,CA9,CAT,CCNT1,CD63,CDK4,CDKN1A,CDS2,CEACAM1,CEBPA,CEBPB,CEBPD,CFH,CHKA,Clec2d (includes others),COX4I1,CPT1A,CPT2,CROT,CS,CTH,CTSE,CYB5B,CYBA,CYCS,CYP2C9,CYP51A1,DBI,DECR1,DECR2,DIO1,ECI1,EHHADH,ELOVL5,ELOVL6,F11R,FABP2,FADS1,FADS2,FASN,FDFT1…	1163 (17)
	TGFB1	0.802	growth factor		1.649		1.32e-18	ABCF1,ABCG2,ABI2,ABL1,ACAA2,ACLY,ACP3,Acp5,ACSL3,ACSS1,ACTN1,ADAM10,ADAM17,ADI1,ADM,ADRA2A,AGR2,AHNAK,ALDH18A1,ALDH2,ALDH3A2,ALDOA,ALDOB,ANKH,ANXA2,ANXA8/ANXA8L1,AP3S1,APOB,APP,AQP11,AQP8,AREG,ARF1,ARF4,ARHGAP35,ASS1,ATF4,ATG12,ATG4B,ATG5,ATG7,ATXN1,AUTS2,B2M,BCL9,BDH1,BIRC5,BSG,C2,CAB39,Calm1 (includes others),CALML4,CAMK2N1,CAPNS1,CAPRIN1,CASP14,CASP4,CAT,CBR3,CCDC28A,CCL5,CCND2,CCNG2,CCT2,CCT5…	1665 (20)
	APP	-0.116	other	Activated	3.73		1.97e-18	ABCG2,ABL1,ACO2,ACTB,ACTG1,ADAM10,AIFM1,ALDOA,ALDOC,Anp32a,ANXA5,APH1A,APLP2,APP,APPBP2,ARF4,ARF5,ARF6,ARNTL,ASCC1,ATF4,ATG5,ATG7,ATOX1,ATP1B1,Atp5e,ATP5F1A,ATP5F1B,ATP5F1C,ATP5F1D,ATP5PD,ATP5PF,ATP6V0D1,ATP6V1A,ATP6V1E1,AXIN1,BACE2,BRD2,BRPF1,BSG,C1QBP,CA12,CALML4,CALR,CANX,CAPN1,CAST,CAT,CCL5,CCND2,CCNG2,CD74,CD82,CDC37,CDH1,CDK4,CDK5,CDK9,CDKN1A,CEBPB,CFH,CFLAR,CITED2,CKMT1A/CKMT1B,CLIC1,CLTA,…	1494 (20)
	poly rI:rC-RNA		biologic drug	Activated	4.159	bias	7.76e-18	1810058I24Rik,ACO2,ACSL3,ADAM10,AIMP1,Anp32a,Apol11b (includes others),Apol7e (includes others),Apol9a/Apol9b,APP,ASB13,ATF4,Atp5e,ATP5MG,ATP6V0A2,AUTS2,B2M,BAK1,BIRC3,BIRC5,C2,CASP7,CCL5,CCND2,CCNT1,CCT5,CD14,CD47,CD74,CDCA3,CDH1,CDK4,CDK7,CEACAM1,CEBPB,CEBPD,CFB,CFLAR,Clec2d (includes others),Clec2e/Clec2h,CNP,COQ9,COX10,COX7A2L,COX7B,CTNNB1,CXCL6,CYC1,DAXX,DHX58,DIO1,DNMT3A,EEF1G,EIF2S3,EIF3B,…	733 (15)
	CAB39L	0.514	kinase	Activated	3.335	bias	1.28e-17	ATP5MC2,ATP5MC3,ATP5MF,ATP5MG,ATP6V0E1,ATP6V1B2,ATP6V1E1,CDKN1A,CDKN1B,COX17,COX4I1,COX8A,NDUFA1,NDUFA12,NDUFA13,NDUFA3,NDUFA4,NDUFB11,NDUFB2,NDUFB3,NDUFB5,NDUFB8,NDUFB9,NDUFC1,NDUFS4,NDUFS6,NDUFV2,UQCR11,UQCRB,UQCRQ	1116 (12)
	IL4	-16.202	cytokine	Activated	3.564	bias	2.57e-17	ABHD17C,ACOX1,Acp5,ACTB,ACTG1,ADAM17,AGFG2,AHNAK,ALAS1,ALDH2,ALDOC,ALG3,ANO1,ANXA2,ANXA4,APH1A,APP,AREG,ARSB,ASS1,AUH,AUTS2,B4GALNT1,BACE2,BANF1,BIRC5,BOP1,BPGM,C15orf48,CA2,CAMK1D,CAND1,CAPG,CASP6,CAT,Ccdc50,CCL5,Ccl6,CCND2,CCT3,CD14,CD38,CD55,CD74,CDKN1A,CDKN1B,CFLAR,CHD4,CITED2,CKAP4,CLIP1,CLTC,CLUH,COBLL1,COX4I1,CRIP1,CSTB,CTNS,CTSC,CXCL6,CYB5A,DCTN1,DDAH1,DDIT4,DDX42,DECR1,DGAT2,DGKA,DHX58,D…	1327 (16)
Table S3
